# Supplementary material for: Governance: A Source to Increase Tax Revenue in Pakistan
Source: Hindawi journal article supplement (doi:10.1155/2021/6663536), 2021-01-01
Supplement: f1 [file 6663536.f1.docx]

| Years | lnTAX | GS | LAO | IC | EC | LNCPI | LNIND | LNIND1 | GS1 | IC1 | EC1 |
| --- | --- | --- | --- | --- | --- | --- | --- | --- | --- | --- | --- |
| 1976 | -0.11536 | 5.813887 | 1.94501 | 5 | 6.03197 | 2.453557 | 2.8739 | 28.739 | 0.581389 | 0.5 | 0.603197 |
| 1977 | -0.02137 | 5.740216 | 1.951801 | 5 | 6.13605 | 2.550075 | 2.864222 | 28.64222 | 0.574022 | 0.5 | 0.613605 |
| 1978 | 0.096837 | 5.943533 | 1.957761 | 5 | 6.029449 | 2.609652 | 2.877698 | 28.77698 | 0.594353 | 0.5 | 0.602945 |
| 1979 | 0.210532 | 6.16844 | 1.962992 | 5 | 6.015234 | 2.689082 | 2.914279 | 29.14279 | 0.616844 | 0.5 | 0.601523 |
| 1980 | 0.37213 | 6.238302 | 1.96758 | 5 | 6.013328 | 2.801859 | 2.919284 | 29.19284 | 0.62383 | 0.5 | 0.601333 |
| 1981 | 0.474052 | 5.974753 | 1.971604 | 5 | 6.01166 | 2.914115 | 2.93273 | 29.3273 | 0.597475 | 0.5 | 0.601166 |
| 1982 | 0.51239 | 5.682474 | 1.975131 | 5 | 6.010202 | 2.971474 | 2.971405 | 29.71405 | 0.568247 | 0.5 | 0.60102 |
| 1983 | 0.577947 | 5.037259 | 1.83228 | 5 | 6.008925 | 3.033152 | 2.95402 | 29.5402 | 0.503726 | 0.5 | 0.600893 |
| 1984 | 0.702772 | 5.25 | 2 | 5 | 6.916667 | 3.092243 | 2.972851 | 29.72851 | 0.525 | 0.5 | 0.691667 |
| 1985 | 0.677388 | 7.583333 | 2 | 5 | 5.333333 | 3.146872 | 2.975092 | 29.75092 | 0.758333 | 0.5 | 0.533333 |
| 1986 | 0.791914 | 8 | 2 | 5 | 5.916667 | 3.181335 | 2.999423 | 29.99423 | 0.8 | 0.5 | 0.591667 |
| 1987 | 0.864824 | 6.75 | 2 | 5 | 6 | 3.227085 | 3.019815 | 30.19815 | 0.675 | 0.5 | 0.6 |
| 1988 | 0.910869 | 4.416667 | 2 | 5 | 6 | 3.311775 | 3.040014 | 30.40014 | 0.441667 | 0.5 | 0.6 |
| 1989 | 1.028519 | 4 | 2 | 5 | 6 | 3.387293 | 3.037068 | 30.37068 | 0.4 | 0.5 | 0.6 |
| 1990 | 1.064123 | 2.166667 | 1.083333 | 5 | 6 | 3.473948 | 3.055764 | 30.55764 | 0.216667 | 0.5 | 0.6 |
| 1991 | 1.096735 | 3.416667 | 1 | 5 | 6 | 3.585412 | 3.056458 | 30.56458 | 0.341667 | 0.5 | 0.6 |
| 1992 | 1.259477 | 4.583333 | 1.25 | 6.166667 | 6 | 3.676249 | 3.051414 | 30.51414 | 0.458333 | 0.616667 | 0.6 |
| 1993 | 1.324293 | 4.75 | 2 | 7.666667 | 8.5 | 3.771319 | 3.081805 | 30.81805 | 0.475 | 0.766667 | 0.85 |
| 1994 | 1.44313 | 6.75 | 2.916667 | 10.75 | 11.16667 | 3.88793 | 3.083213 | 30.83213 | 0.675 | 1.075 | 1.116667 |
| 1995 | 1.607729 | 7 | 3 | 10.5 | 10 | 4.004322 | 3.075373 | 30.75373 | 0.7 | 1.05 | 1 |
| 1996 | 1.730072 | 8.25 | 3.583333 | 9 | 9.5 | 4.103024 | 3.074199 | 30.74199 | 0.825 | 0.9 | 0.95 |
| 1997 | 1.780488 | 9.75 | 3.916667 | 9.583333 | 10.08333 | 4.210762 | 3.060849 | 30.60849 | 0.975 | 0.958333 | 1.008333 |
| 1998 | 1.84401 | 10.16667 | 3 | 9.166667 | 7.833333 | 4.271179 | 3.095022 | 30.95022 | 1.016667 | 0.916667 | 0.783333 |
| 1999 | 1.904644 | 9.25 | 3 | 7.833333 | 7.083333 | 4.31177 | 3.107113 | 31.07113 | 0.925 | 0.783333 | 0.708333 |
| 2000 | 1.900287 | 10.83333 | 3 | 7.083333 | 6.083333 | 4.354511 | 3.078031 | 30.78031 | 1.083333 | 0.708333 | 0.608333 |
| 2001 | 1.965693 | 9.583333 | 3 | 7.083333 | 6.916667 | 4.385508 | 3.098892 | 30.98892 | 0.958333 | 0.708333 | 0.691667 |
| 2002 | 2.013373 | 9.833333 | 3 | 6.666667 | 7.375 | 4.417881 | 3.093779 | 30.93779 | 0.983333 | 0.666667 | 0.7375 |
| 2003 | 2.116636 | 9.5 | 3 | 6.875 | 8.166667 | 4.446606 | 3.087947 | 30.87947 | 0.95 | 0.6875 | 0.816667 |
| 2004 | 2.140227 | 9.416667 | 3 | 6.958333 | 8.333333 | 4.518412 | 3.167534 | 31.67534 | 0.941667 | 0.695833 | 0.833333 |
| 2005 | 2.1426 | 9.291667 | 3 | 6 | 8.125 | 4.60517 | 3.208017 | 32.08017 | 0.929167 | 0.6 | 0.8125 |
| 2006 | 2.280538 | 9 | 3 | 6 | 8.833333 | 4.6814 | 3.188305 | 31.88305 | 0.9 | 0.6 | 0.883333 |
| 2007 | 2.334983 | 6.708333 | 3 | 5.666667 | 8.833333 | 4.754638 | 3.217447 | 32.17447 | 0.670833 | 0.566667 | 0.883333 |
| 2008 | 2.484452 | 5.5 | 3 | 6.333333 | 8.541667 | 4.939342 | 3.215833 | 32.15833 | 0.55 | 0.633333 | 0.854167 |
| 2009 | 2.593282 | 6.416667 | 3 | 6.416667 | 8.5 | 5.067275 | 3.179467 | 31.79467 | 0.641667 | 0.641667 | 0.85 |
| 2010 | 2.670954 | 5.833333 | 3.416667 | 5.833333 | 8.5 | 5.19726 | 3.203767 | 32.03767 | 0.583333 | 0.583333 | 0.85 |
| 2011 | 2.74269 | 5 | 3.5 | 5.5 | 8.5 | 5.309846 | 3.181861 | 31.81861 | 0.5 | 0.55 | 0.85 |
| 2012 | 2.805604 | 5.25 | 3.5 | 5.5 | 8.5 | 5.402289 | 3.174329 | 31.74329 | 0.525 | 0.55 | 0.85 |
| 2013 | 2.841309 | 5.025 | 3.733333 | 5.141667 | 8.483333 | 5.493474 | 3.166588 | 31.66588 | 0.5025 | 0.514167 | 0.848333 |
| 2014 | 2.86294 | 4.495 | 3.895 | 4.813333 | 8.486667 | 5.577186 | 3.164577 | 31.64577 | 0.4495 | 0.481333 | 0.848667 |
| 2015 | 2.929477 | 4.325167 | 3.966 | 4.638167 | 8.481 | 5.679055 | 3.150128 | 31.50128 | 0.432517 | 0.463817 | 0.8481 |
| 2016 | 2.965677 | 4.187633 | 4.116967 | 4.395533 | 8.4748 | 5.766365 | 3.145531 | 31.45531 | 0.418763 | 0.439553 | 0.84748 |
| 2017 | 3.003495 | 3.80919 | 4.28224 | 4.08401 | 8.46934 | 5.857794 | 3.138014 | 31.38014 | 0.380919 | 0.408401 | 0.846934 |
| 2018 | 3.048712 | 3.546702 | 4.394642 | 3.854608 | 8.467072 | 5.95012 | 3.13011 | 31.3011 | 0.35467 | 0.385461 | 0.846707 |
| 2019 | 3.095729 | 3.348967 | 4.525627 | 3.615648 | 8.460521 | 6.043486 | 3.121358 | 31.21358 | 0.334897 | 0.361565 | 0.846052 |
